# Supplementary material for: Comparative Coastal Risk Index (CCRI): A multidisciplinary risk index for Latin America and the Caribbean
Source: PLOS journal article supplement (doi:10.1371/journal.pone.0187011), 2017-11-02
Supplement: S1 (10.1371/journal.pone.0187011.s001) [file journal.pone.0187011.s001]

# Hazards – Self Organizing Maps (10X10 matrix) for each Hazard variable with probability matrix

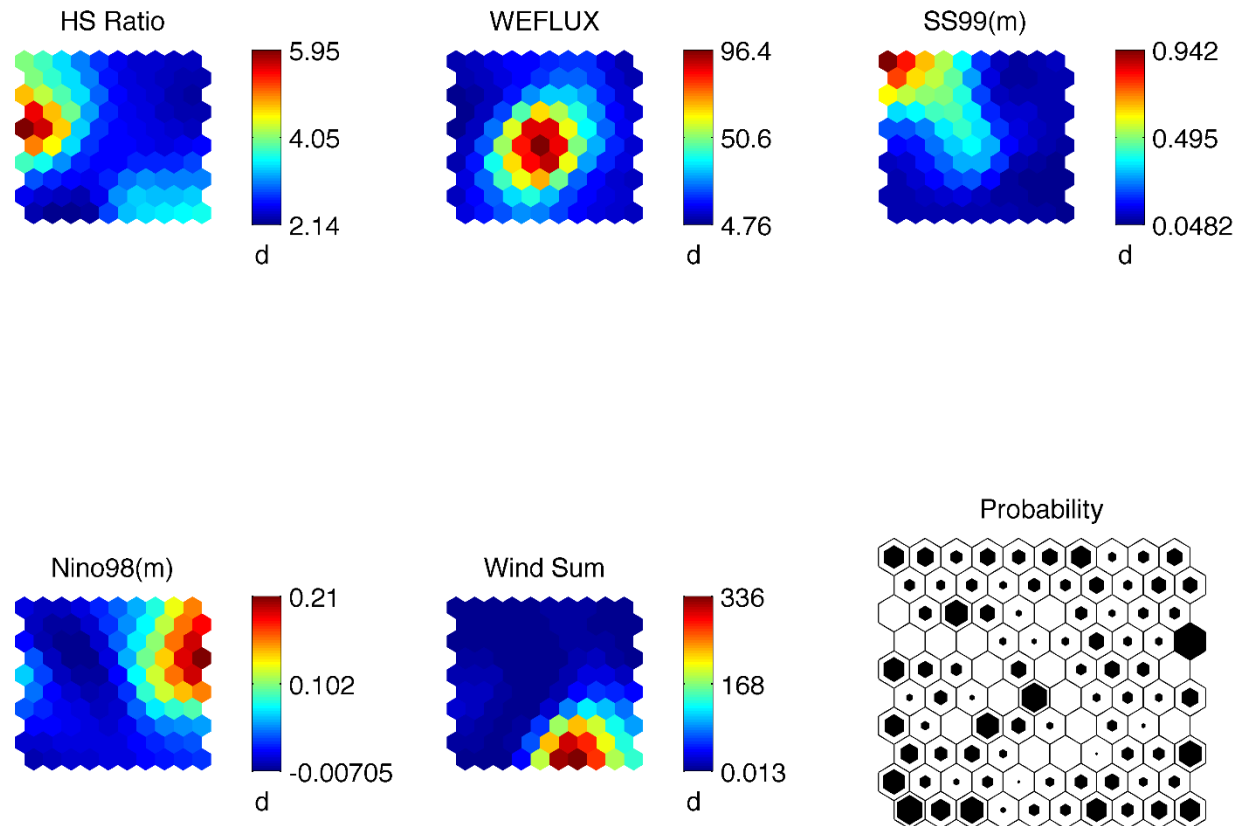

## 9 K-Means Clusters (Indicated by distinct colors)

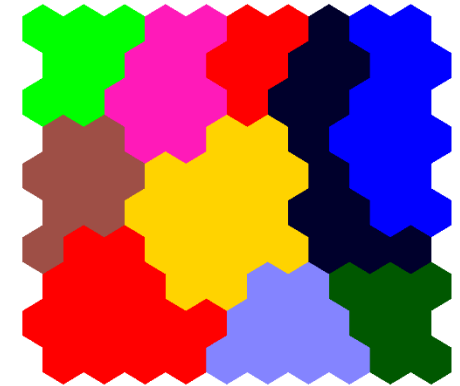

# Hazards – Self Organizing Maps (10X10 matrix) for each Hazard variable with probability matrix

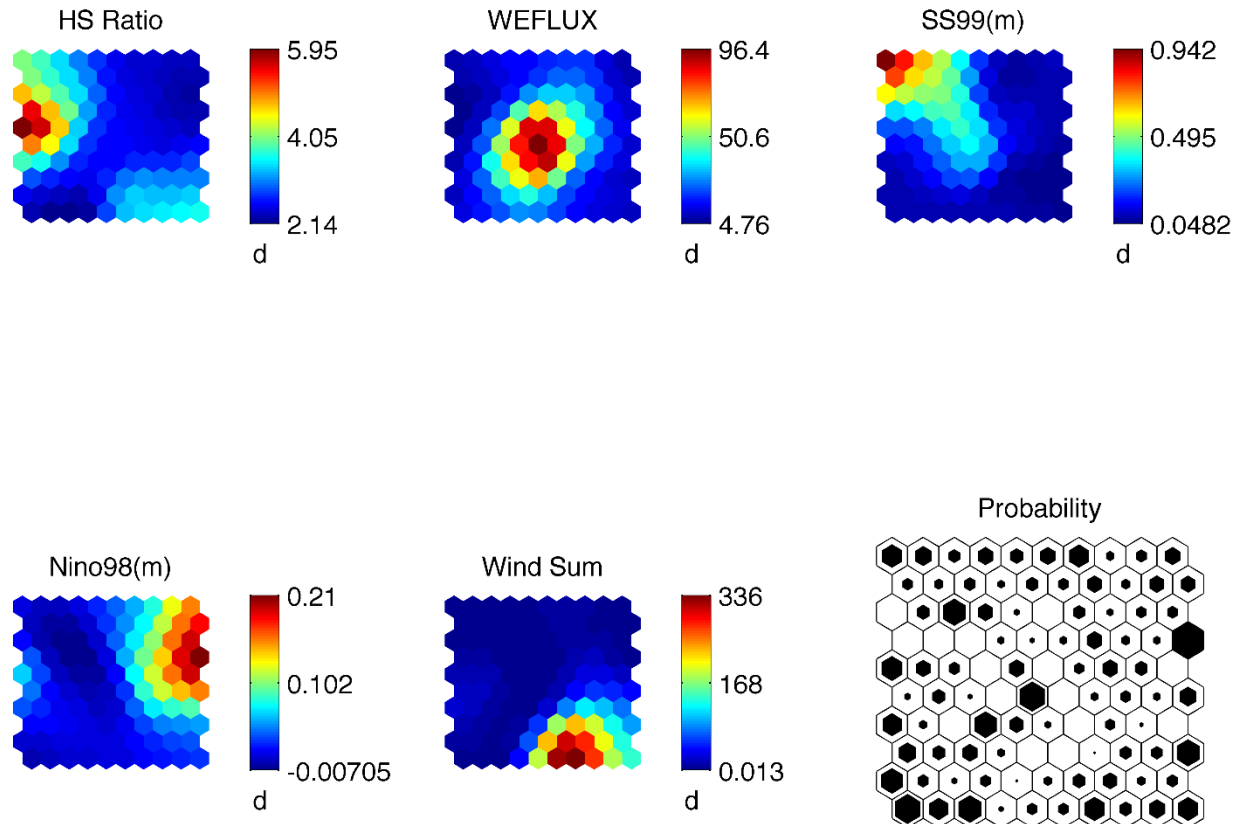

## 9 K-Means Clusters

Probability

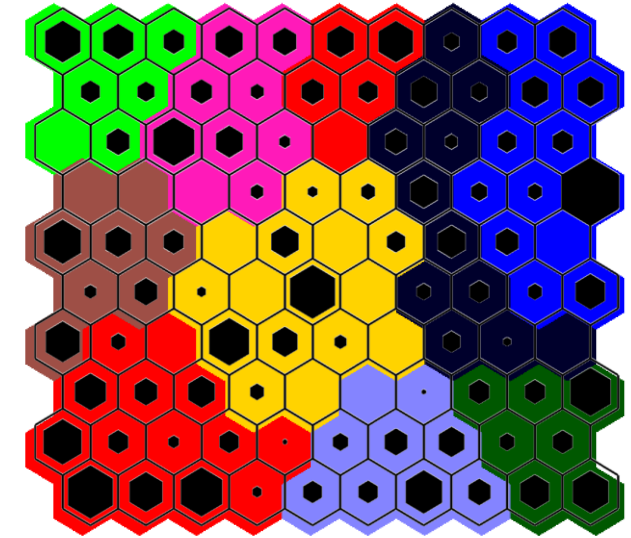

Probability

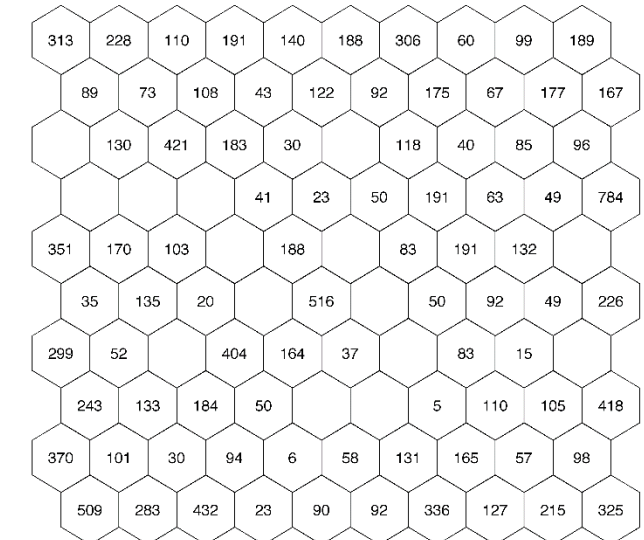

# 9 K-Means Clusters - Hazards

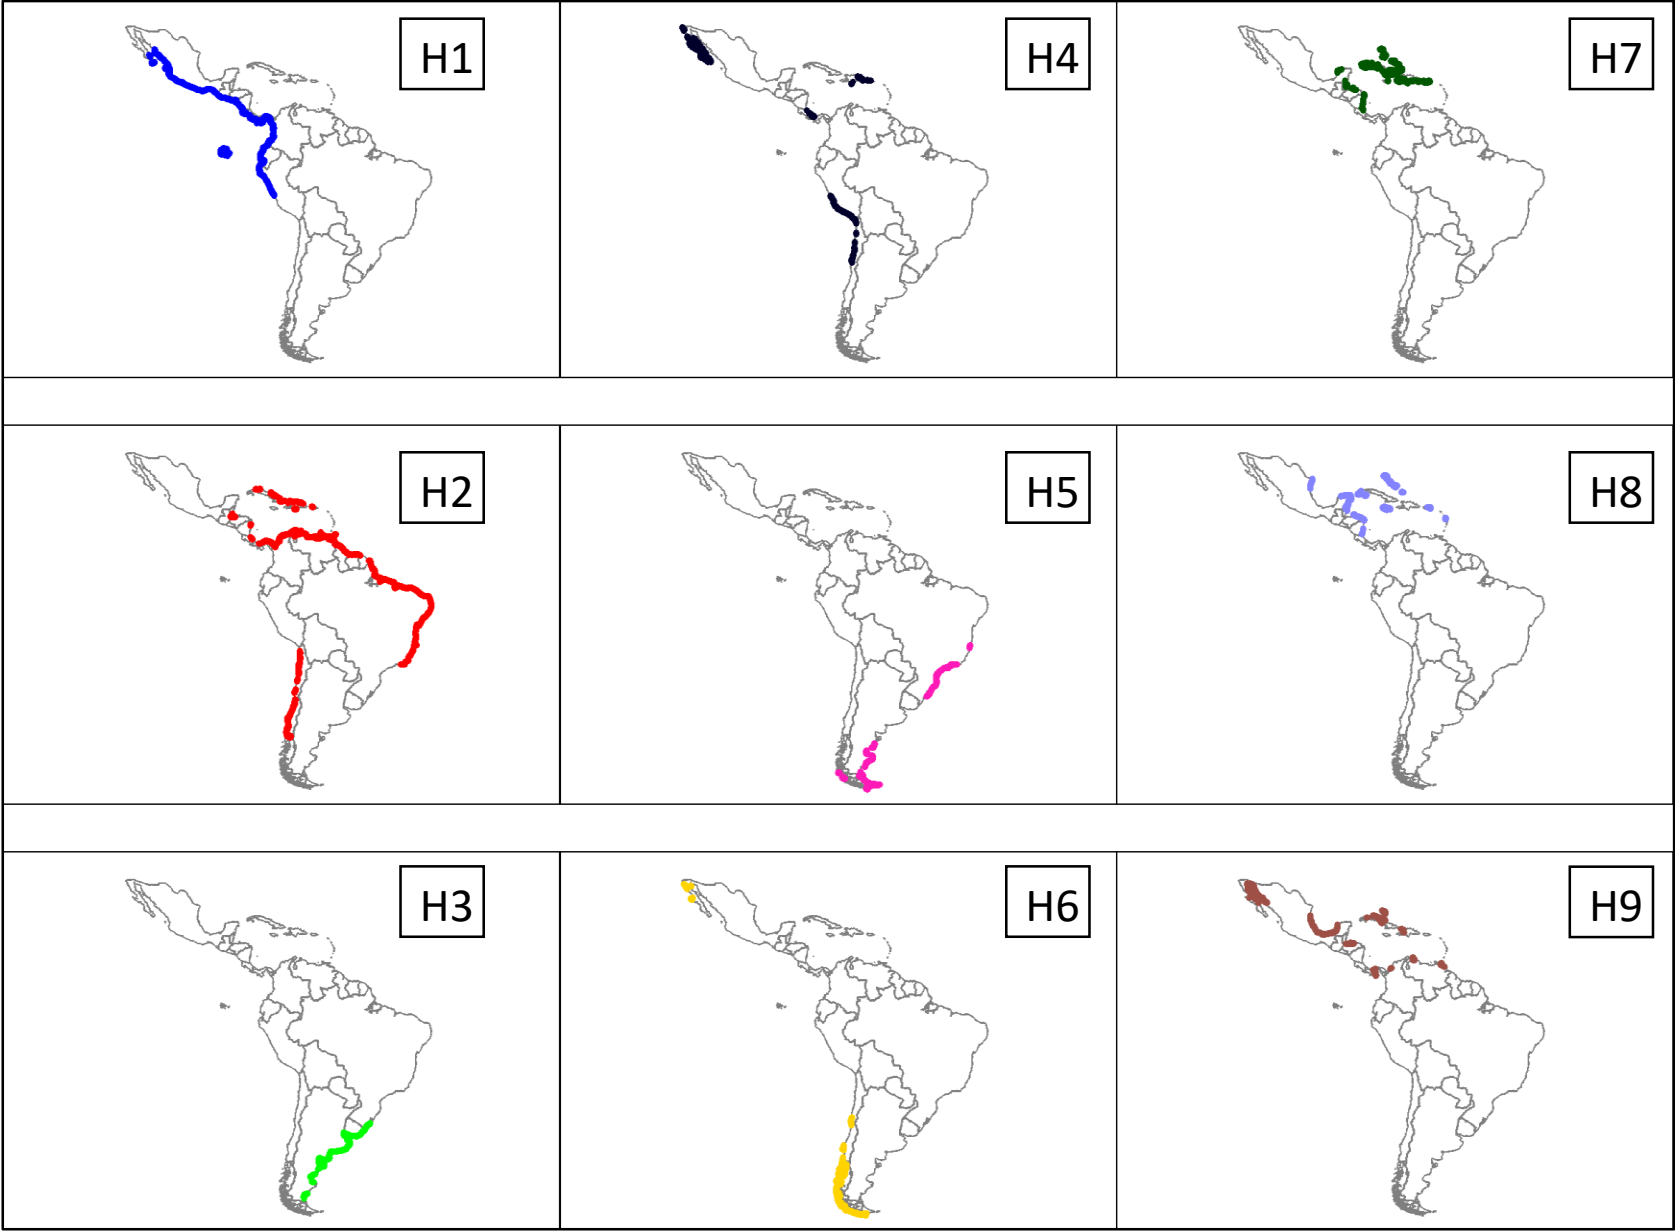

Cluster's Statistics  
(normalized from  
0 to 1)

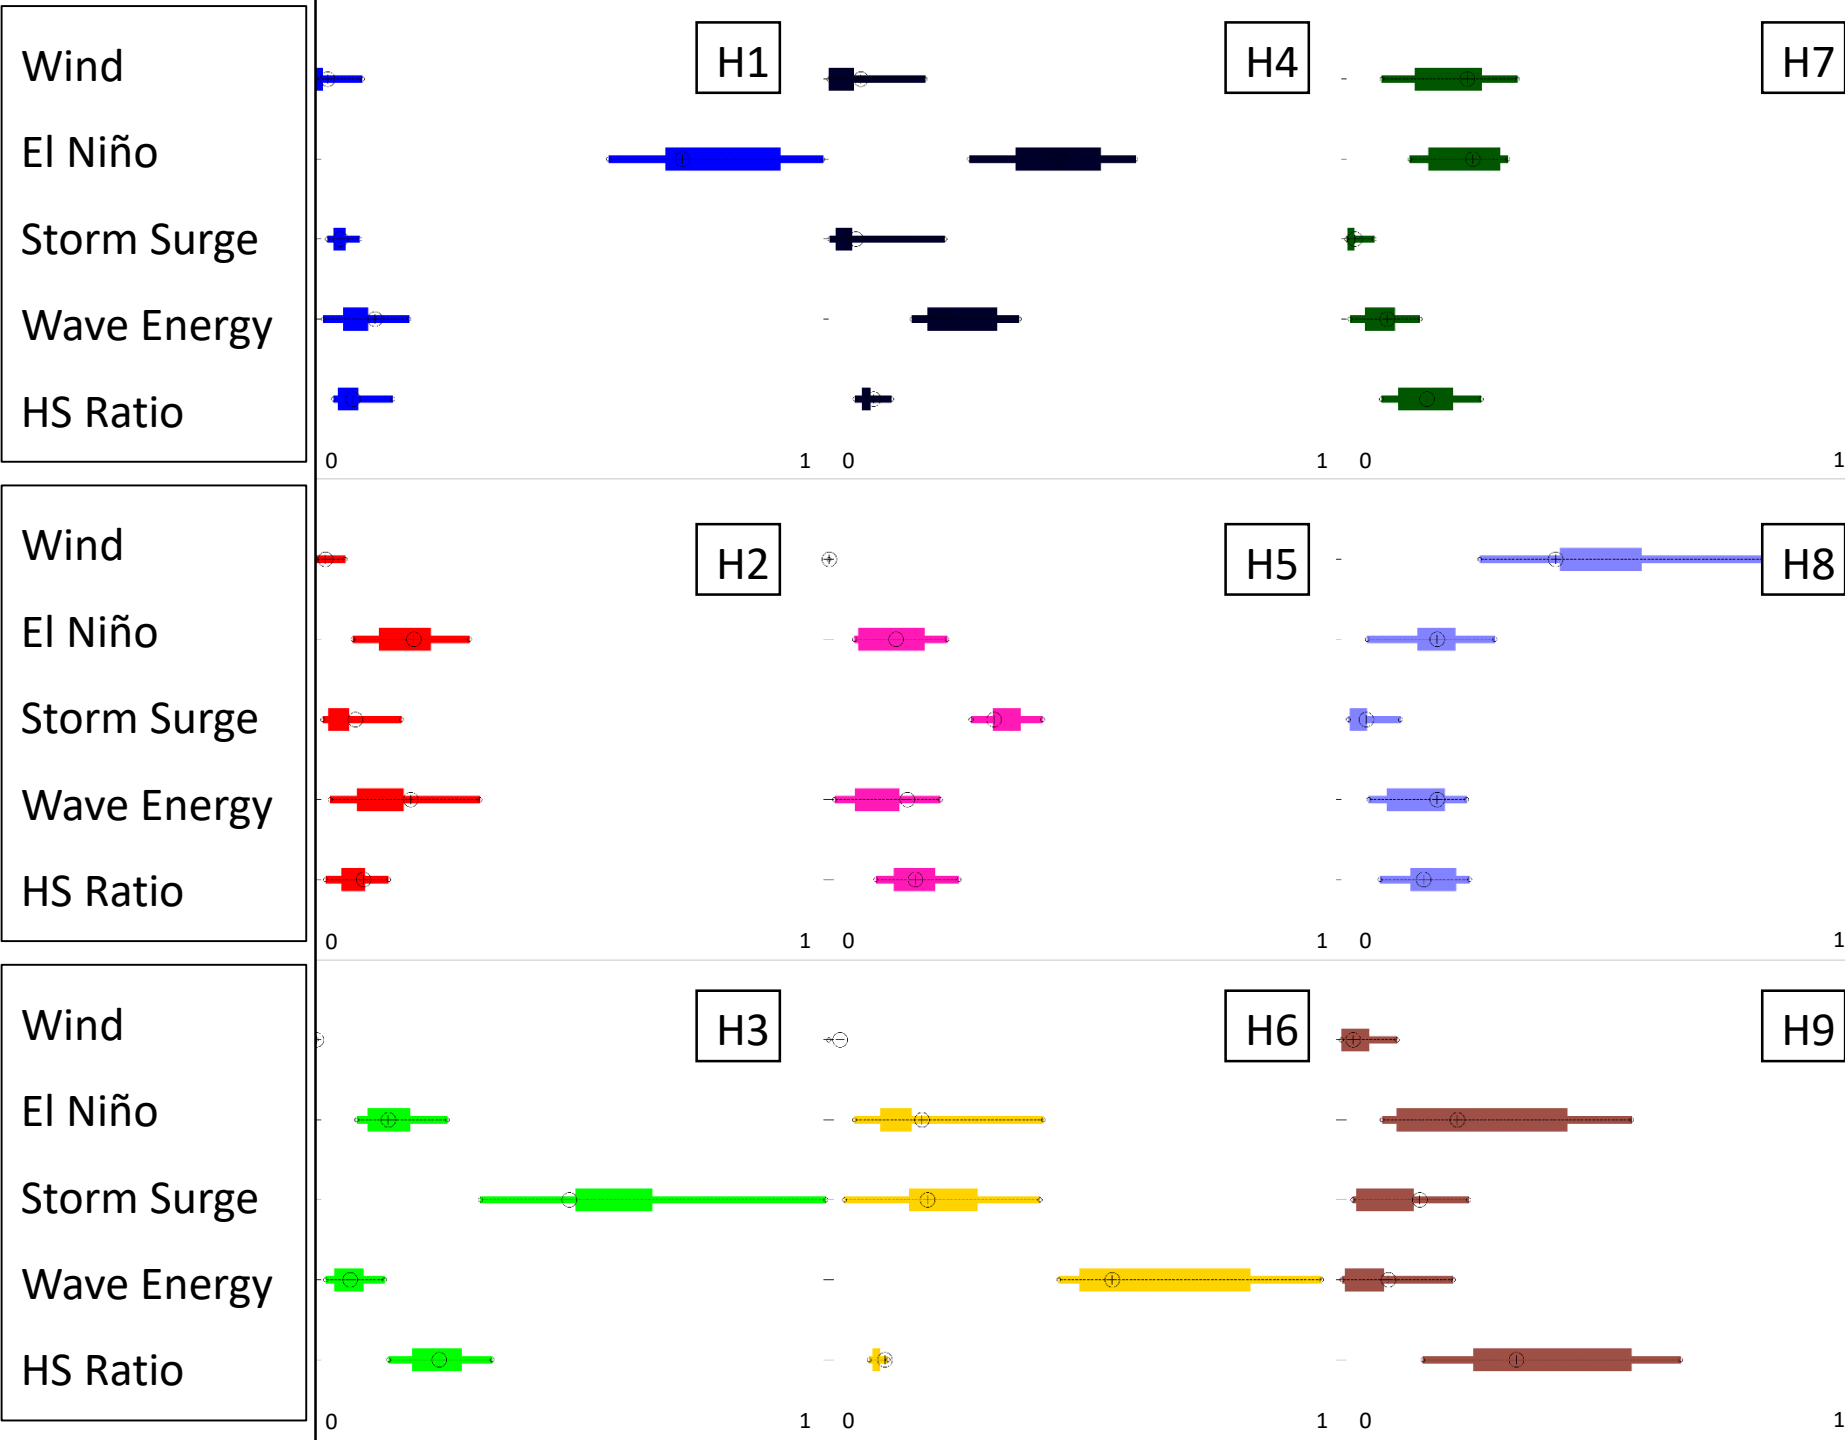

# Sample: K-Means Cluster Hazards Statistics

| K-Means | N Rows | Mean(Wave Energy) | Histogram(Wave Energy)                                                            | Mean(SS99)   | Histogram(SS99)                                                                    | Mean(EI Nino) | Histogram(EI Nino)                                                                  | Mean(Wind Sum) | Histogram(Wind Sum)                                                                 | Mean(HS Ratio) | Histogram(HS Ratio)                                                                 |
|---------|--------|-------------------|-----------------------------------------------------------------------------------|--------------|------------------------------------------------------------------------------------|---------------|-------------------------------------------------------------------------------------|----------------|-------------------------------------------------------------------------------------|----------------|-------------------------------------------------------------------------------------|
| 1       | 2116   | 0.0858696969      | 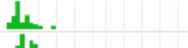 | 0.0478584344 |  | 0.7825268029  |  | 0.0172924252   |  | 0.071056078    |  |
| 2       | 3168   | 0.1346826448      |  | 0.0544004294 |  | 0.1767813514  |  | 0.0097777377   |  | 0.0744972804   |  |
| 3       | 943    | 0.0682698695      |  | 0.5905037952 |  | 0.1401242673  |  | 0              |  | 0.2337813691   |  |
| 4       | 1082   | 0.2678500391      |  | 0.0499076808 |  | 0.445247803   |  | 0.0343851505   |  | 0.076743854    |  |
| 5       | 1157   | 0.1028690753      |  | 0.3439554035 |  | 0.1208060182  |  | 0              |  | 0.1698981274   |  |
| 6       | 1535   | 0.6644418599      |  | 0.2211877062 |  | 0.1475840497  |  | 0.000024144    |  | 0.094377563    |  |
| 7       | 1328   | 0.0766396739      |  | 0.0238296092 |  | 0.2461370753  |  | 0.2062254648   |  | 0.1718667528   |  |
| 8       | 1004   | 0.1390754709      |  | 0.0394996769 |  | 0.178700361   |  | 0.5176629101   |  | 0.1767546375   |  |
| 9       | 1093   | 0.0606986355      |  | 0.1004138202 |  | 0.2800525827  |  | 0.033175051    |  | 0.3953525411   |  |

**Exposure - Self Organizing Maps (10X10 matrix)  
for each Exposure variable with probability matrix**

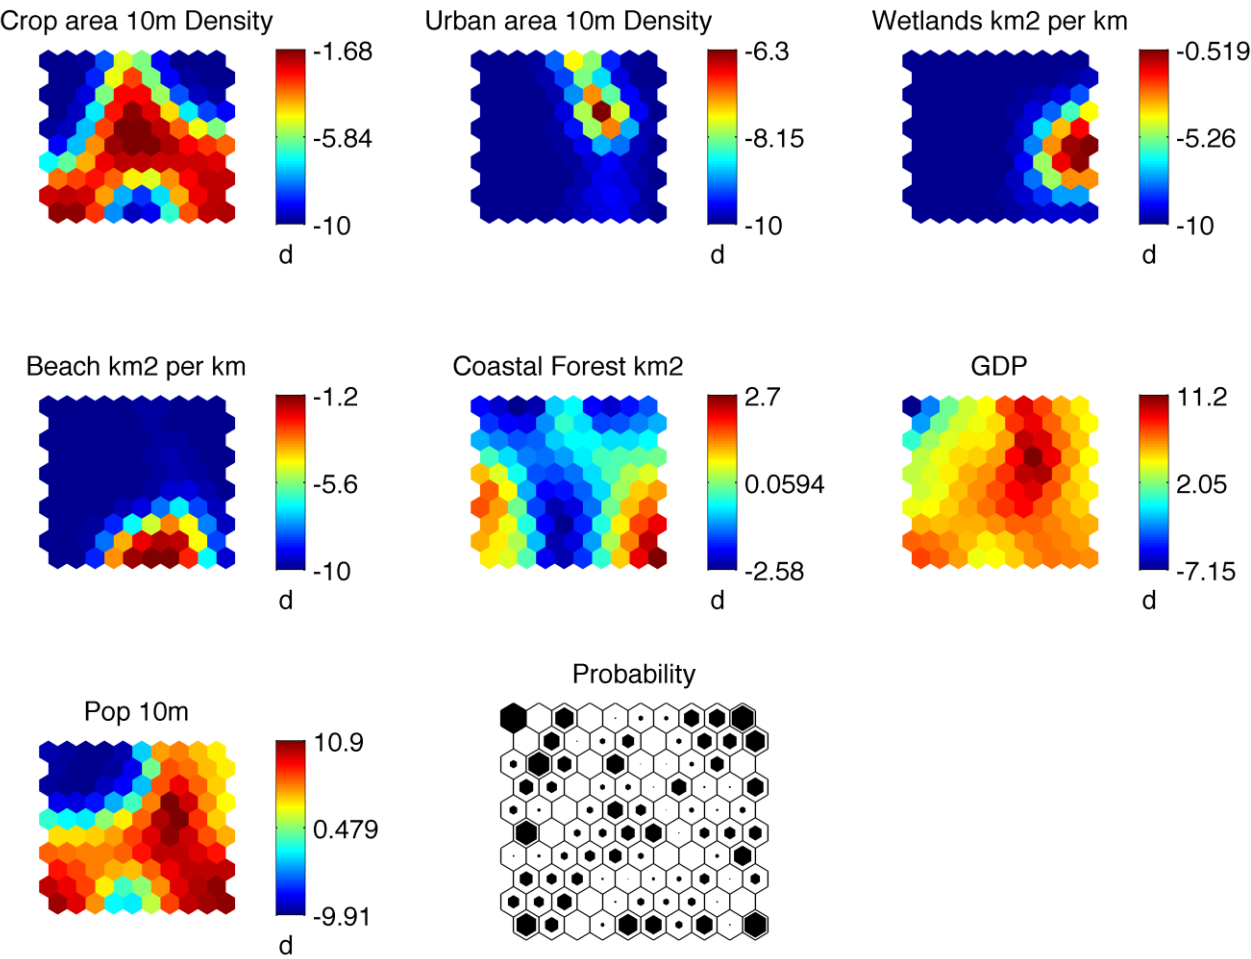

SOM 04-Nov-2016

**9 K-Means Clusters  
(Indicated by distinct colors)**

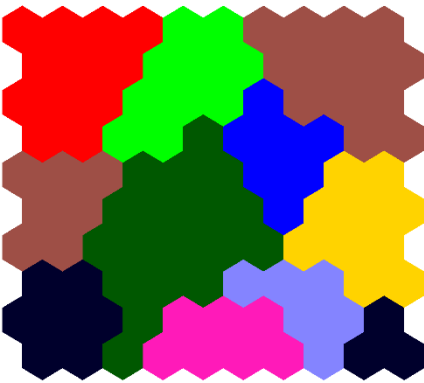

Exposure - Self Organizing Maps (10X10 matrix)  
for each Exposure variable with probability matrix

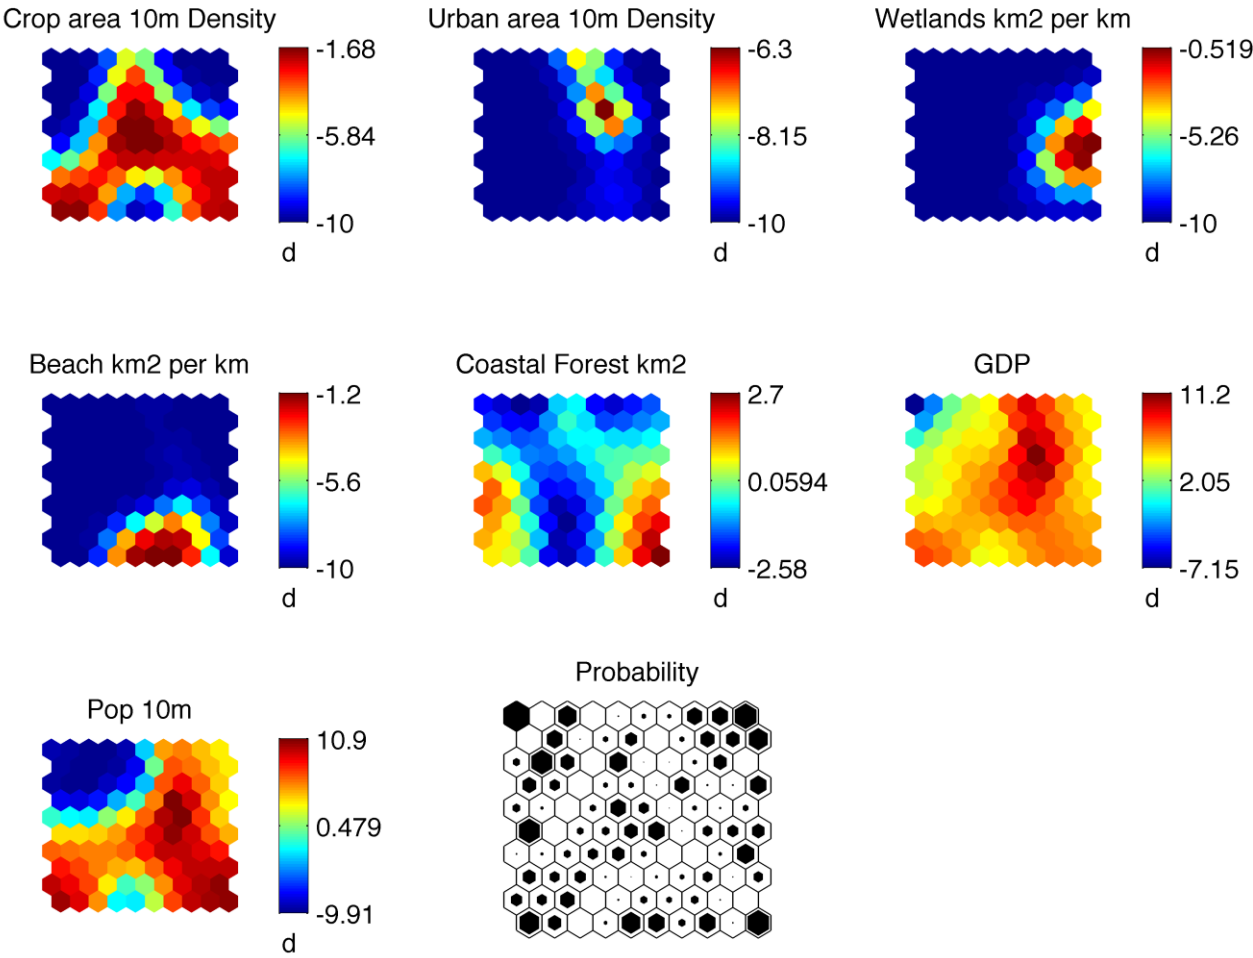

SOM 04-Nov-2016

9 K-Means Clusters  
(Indicated by distinct colors)

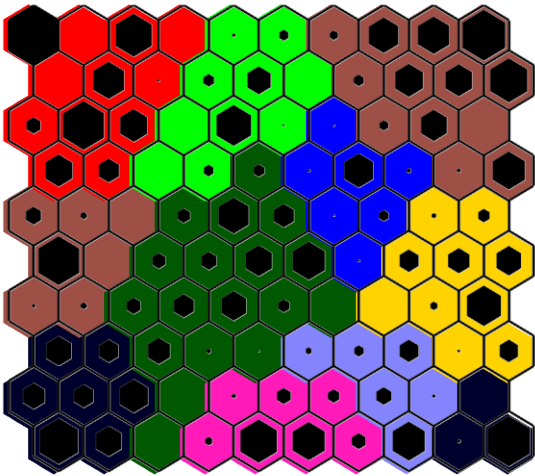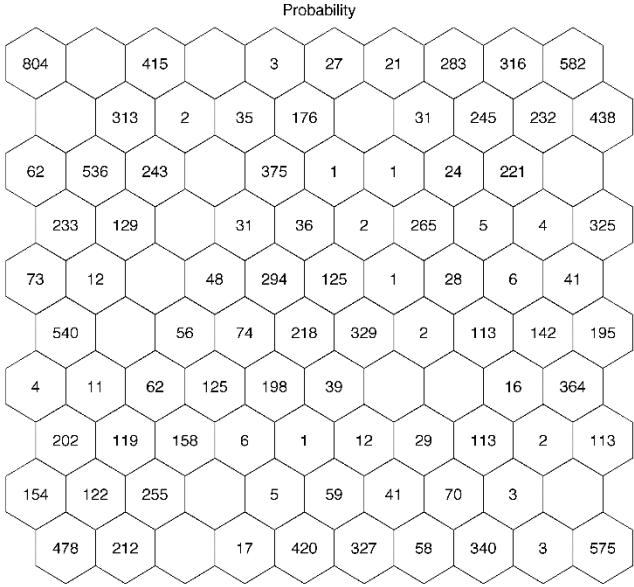

SOM 25-May-2016

# 9 K-Means Clusters - Exposure

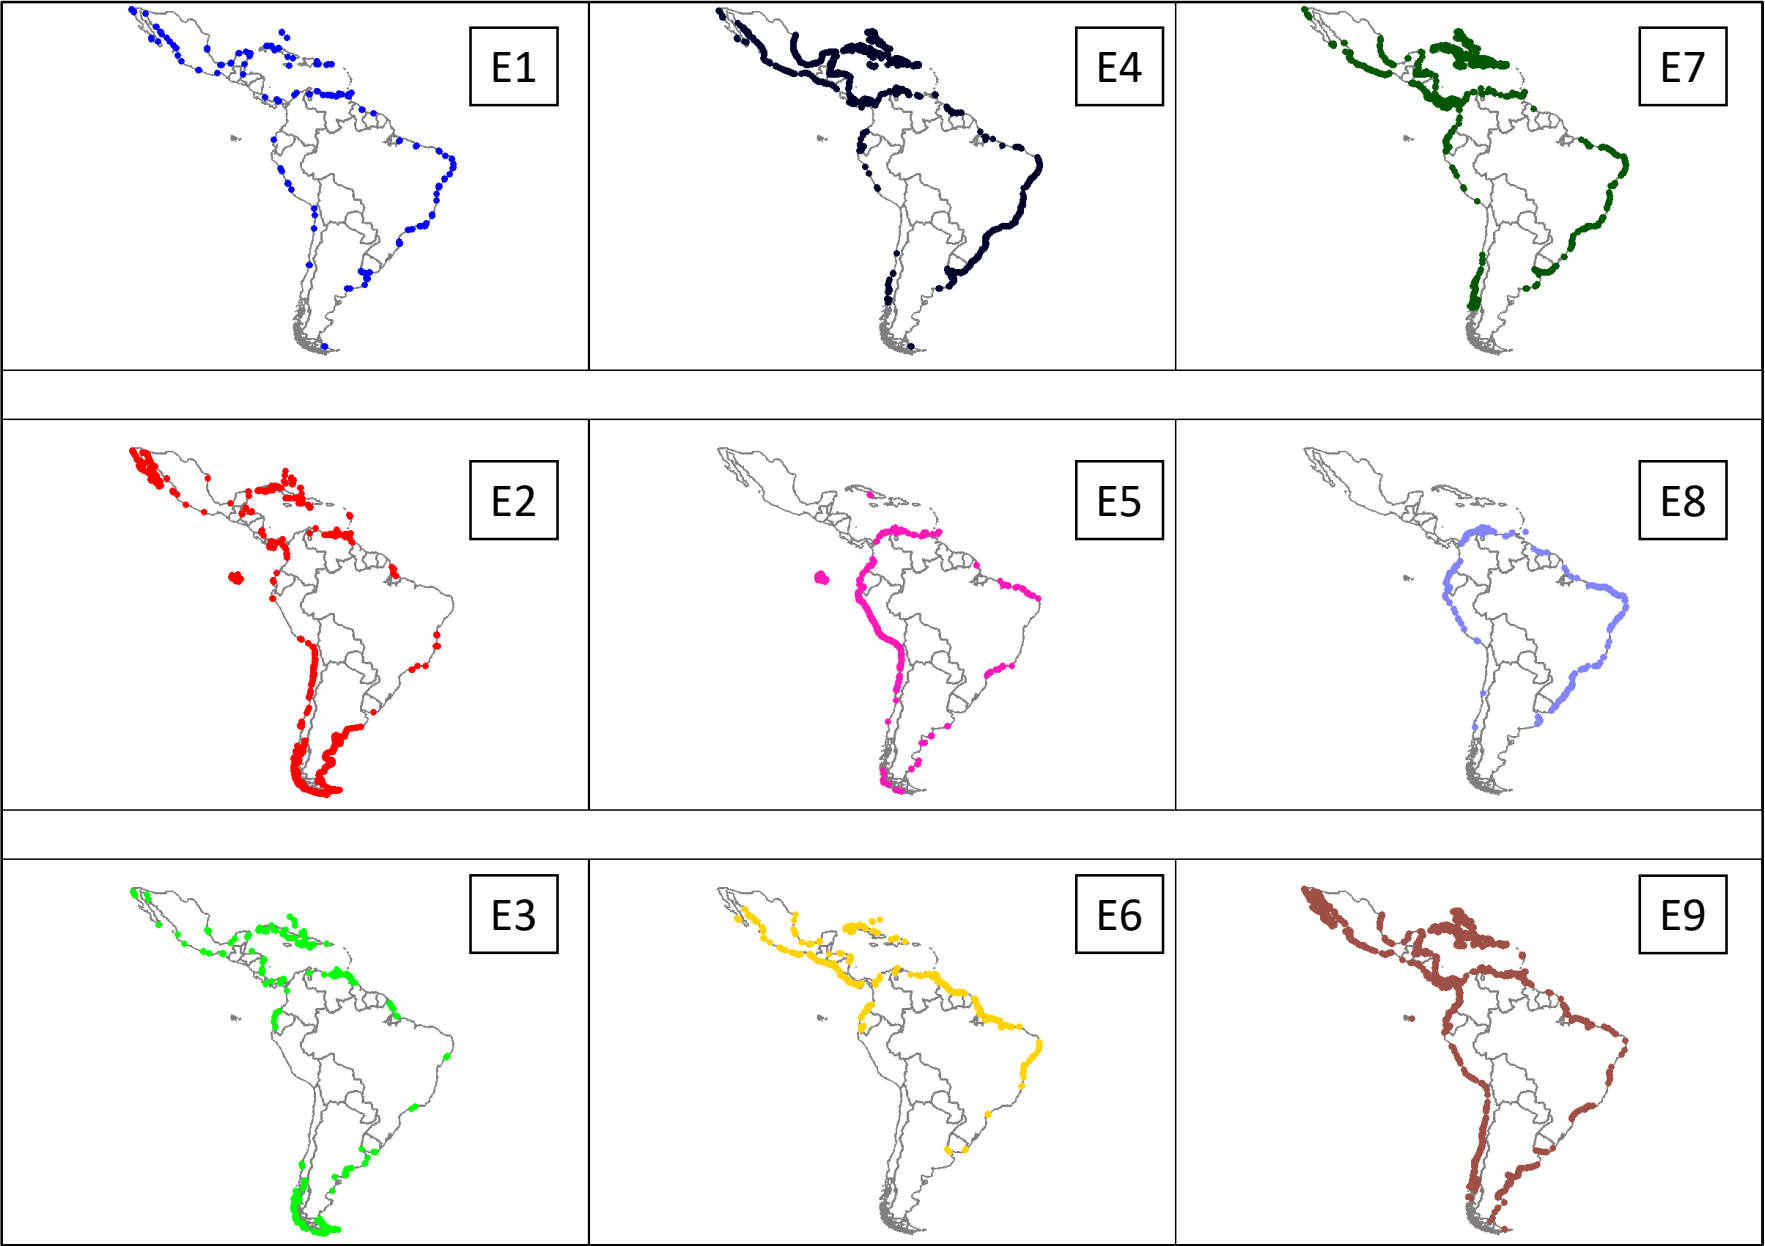



## Cluster's Statistics (normalized from 0 to 1)

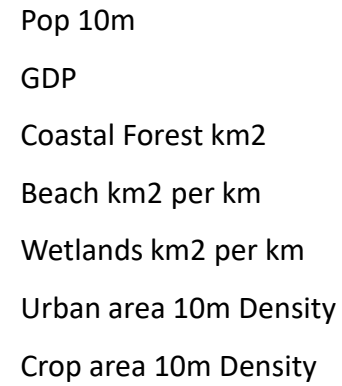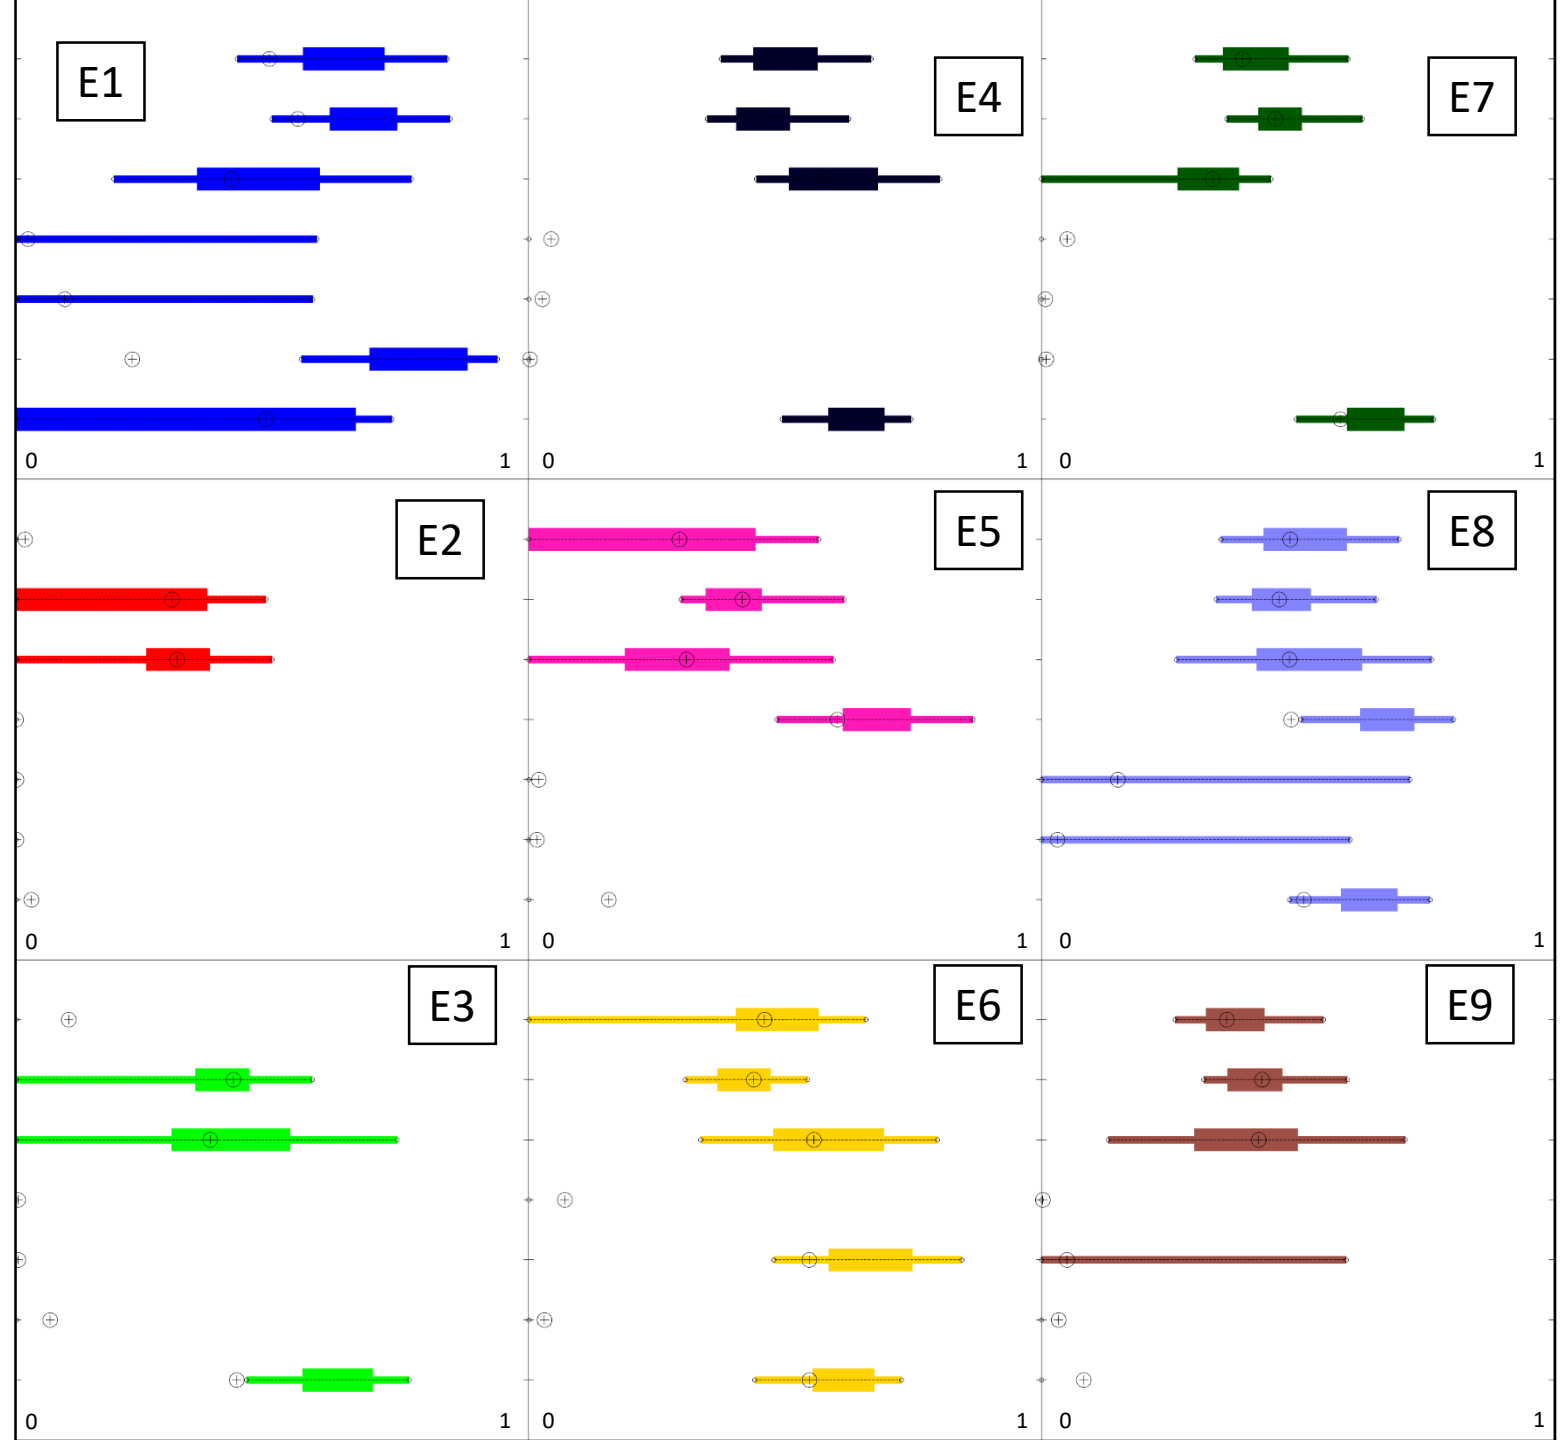

# Vulnerability - Self Organizing Maps (10X10 matrix) for each vulnerability variable with probability matrix

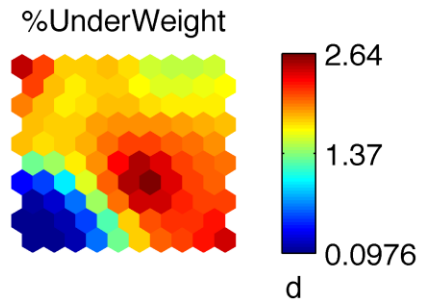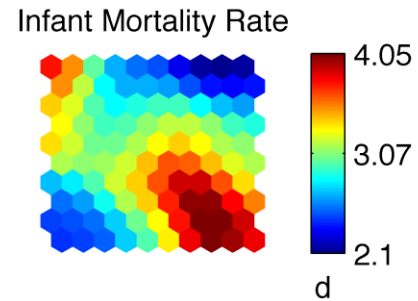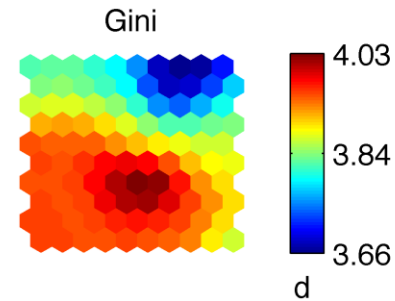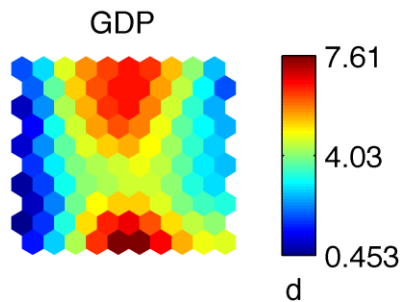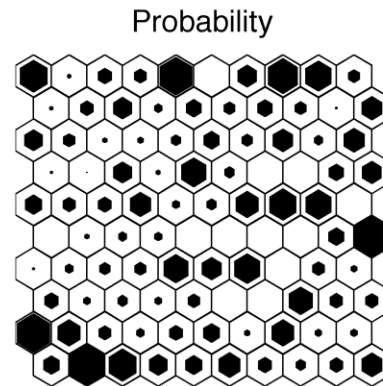

## 9 K-Means Clusters (Indicated by distinct colors)

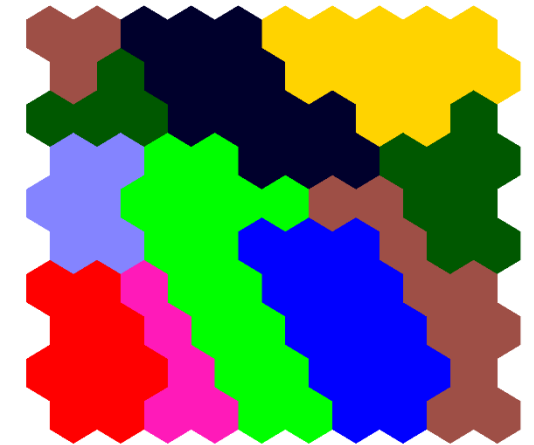

# Vulnerability - Self Organizing Maps (10X10 matrix) for each vulnerability variable with probability matrix

# 9 K-Means Clusters (Indicated by distinct colors)

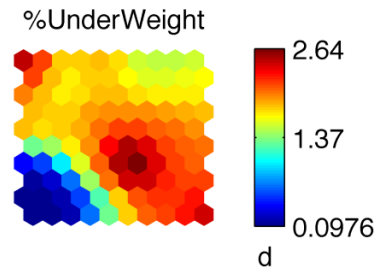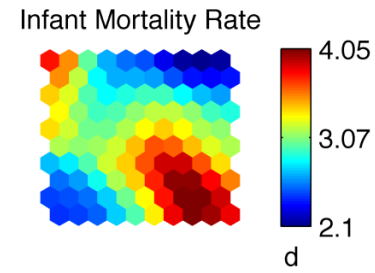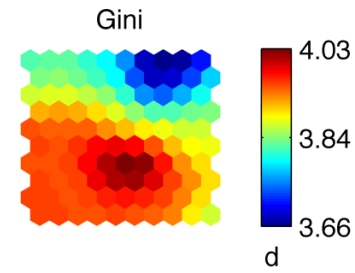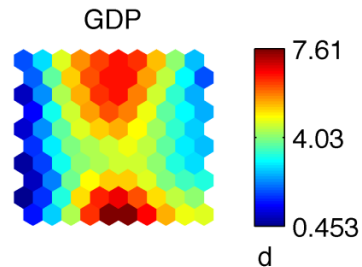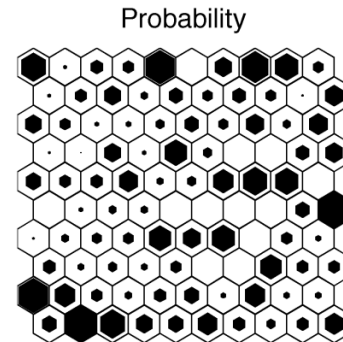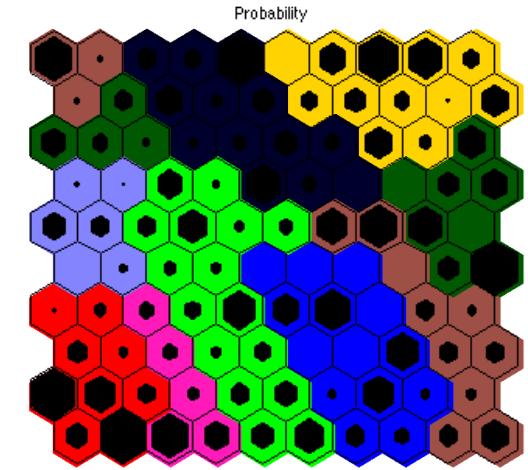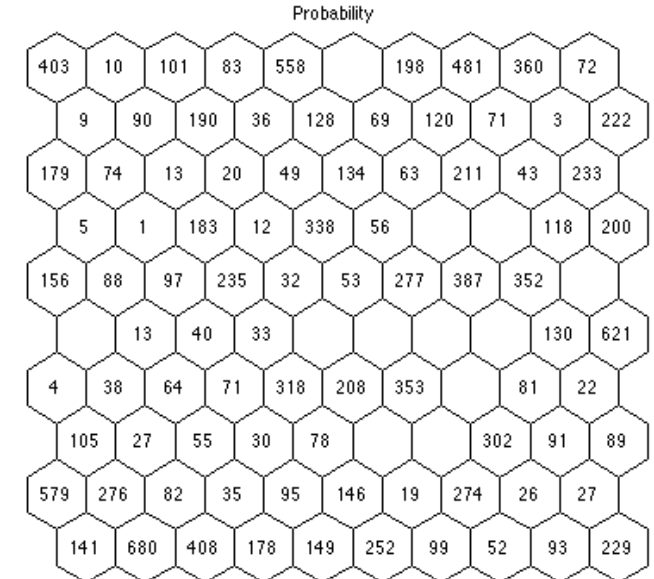

# 9 K-Means Clusters - Vulnerability

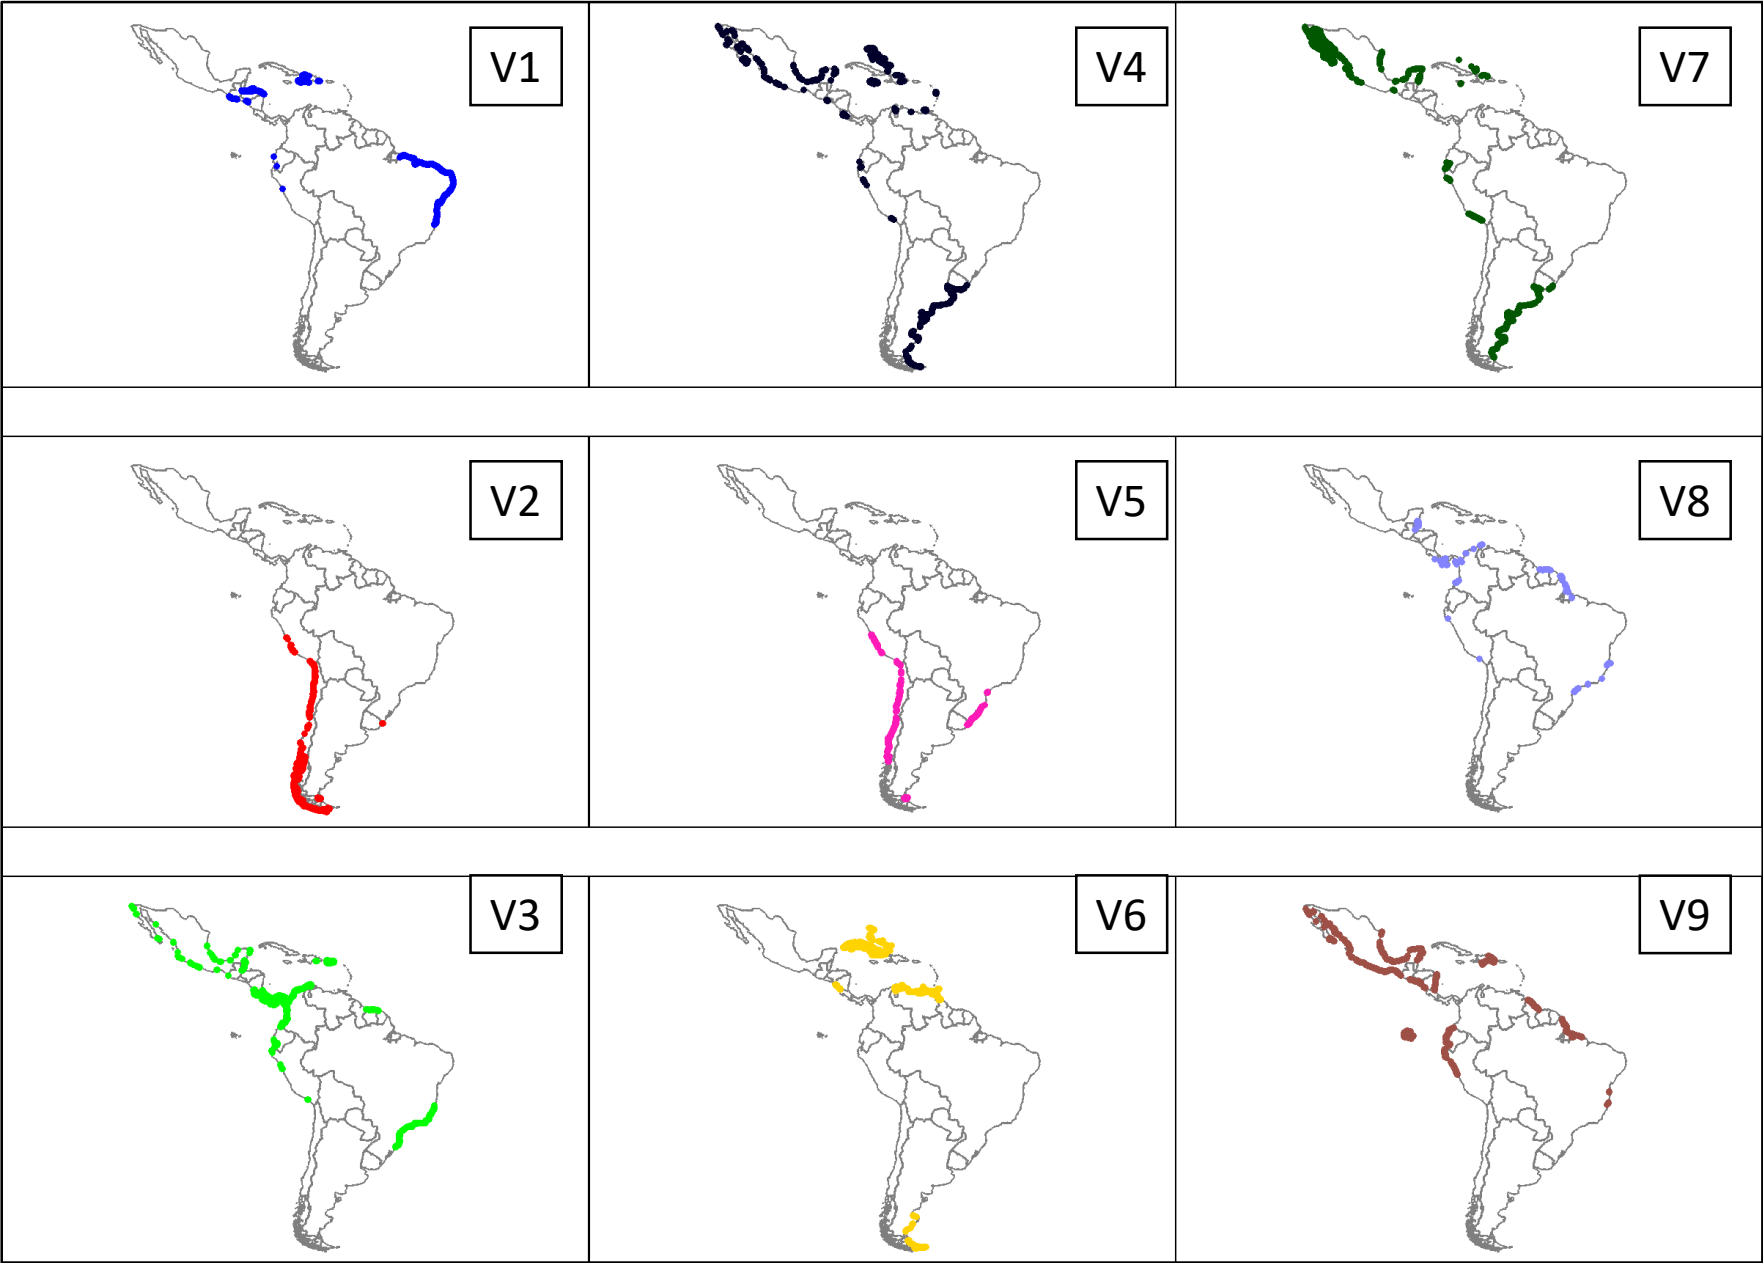

Cluster's Statistics  
(normalized from  
0 to 1)

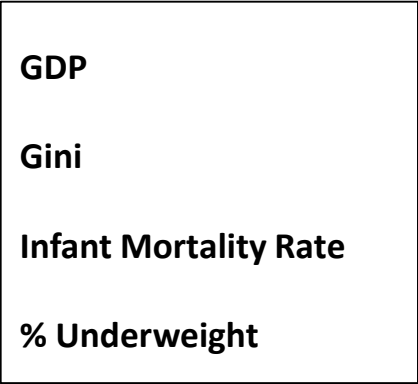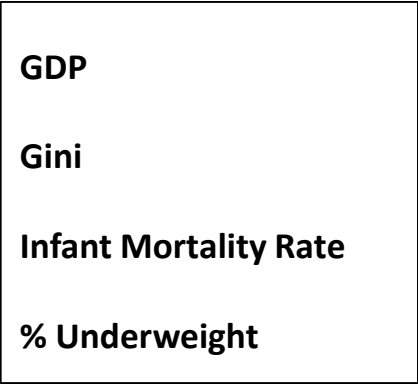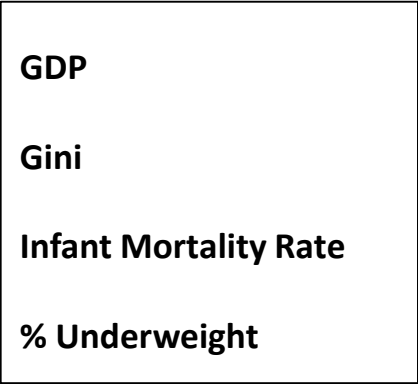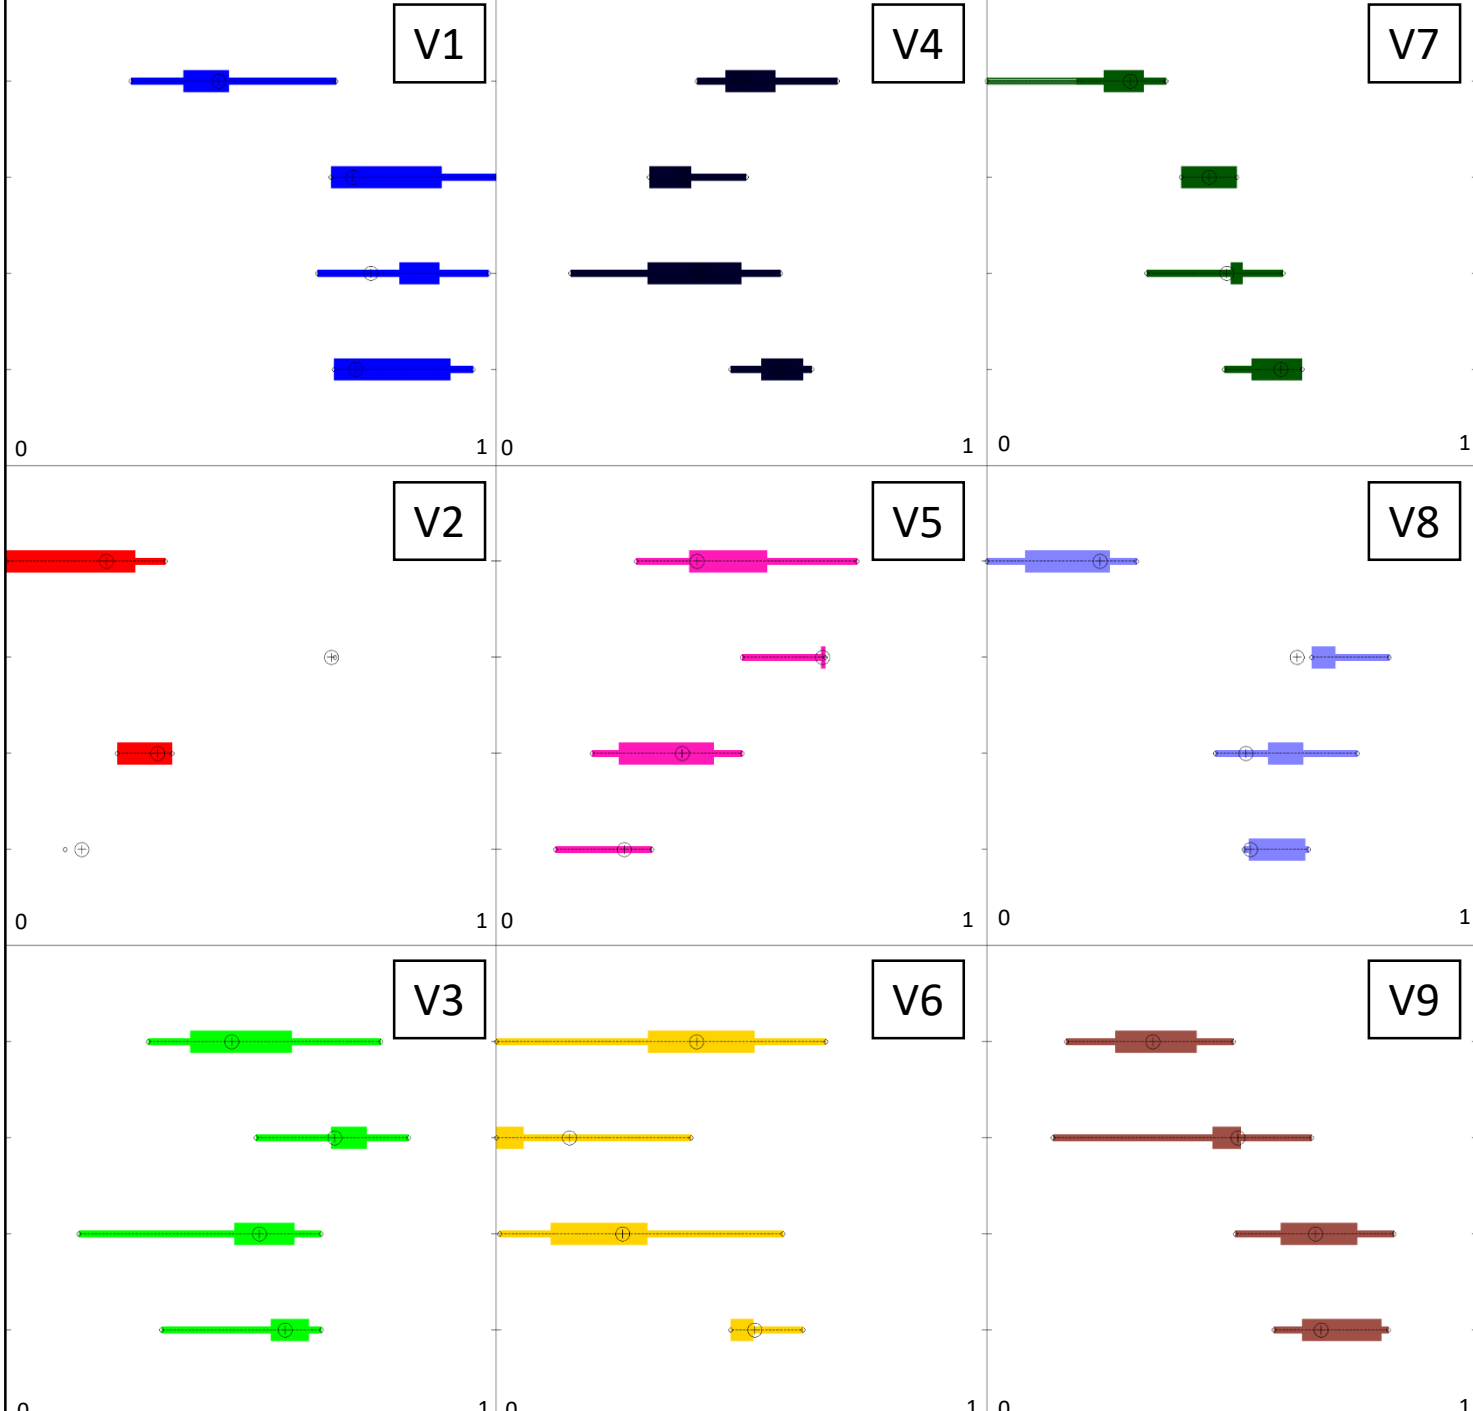

# Sample K-Means Cluster Vulnerability

| K-Means | N Rows | Mean(%UnderWeight) | Mean(Mortality)  | Mean(GINI)       | Mean(GDP)         | Histogram(%Under Weight)                                                             | Histogram(Mortality)                                                                 | Histogram(GINI)                                                                      | Histogram(GDP)                                                                       |
|---------|--------|--------------------|------------------|------------------|-------------------|--------------------------------------------------------------------------------------|--------------------------------------------------------------------------------------|--------------------------------------------------------------------------------------|--------------------------------------------------------------------------------------|
| 1       | 1333   | 0.775965115789621  | 0.83551802438239 | 0.7741100689272  | 0.420505408063459 |   |   |   |   |
| 2       | 1932   | 0.12238828603617   | 0.27614799282587 | 0.66556779535026 | 0.172994705666514 |   |   |   |   |
| 3       | 1824   | 0.56572645268627   | 0.49595990197717 | 0.68581040930024 | 0.484473707926215 |   |   |   |   |
| 4       | 1756   | 0.578658767342739  | 0.39450833110784 | 0.38106520599262 | 0.528088485792487 |   |   |   |   |
| 5       | 740    | 0.162405611974409  | 0.33246643892461 | 0.64347008988118 | 0.474565679066443 |   |   |   |   |
| 6       | 1850   | 0.510923118300054  | 0.21461937559722 | 0.07274946957275 | 0.397275112570467 |   |   |   |   |
| 7       | 2010   | 0.601273615698558  | 0.48418782220538 | 0.46969871678826 | 0.263047314728395 |   |   |   |   |
| 8       | 263    | 0.594335750273435  | 0.60371648858827 | 0.69340777505555 | 0.167295103742832 |   |   |   |   |
| 9       | 1718   | 0.704549675203073  | 0.67189378423161 | 0.47920903525086 | 0.352385563292248 |  |  |  |  |
